# Supplementary material for: Dual inhibition of Type I and Type III PI3 kinases increases tumor cell apoptosis in HER2+ breast cancers
Source: Springer Nature journal article supplement (doi:10.1186/s13058-015-0656-2), 2015-12-01
Supplement: MOESM1 [file 9781600]

## SUPPLEMENTARY FIGURES

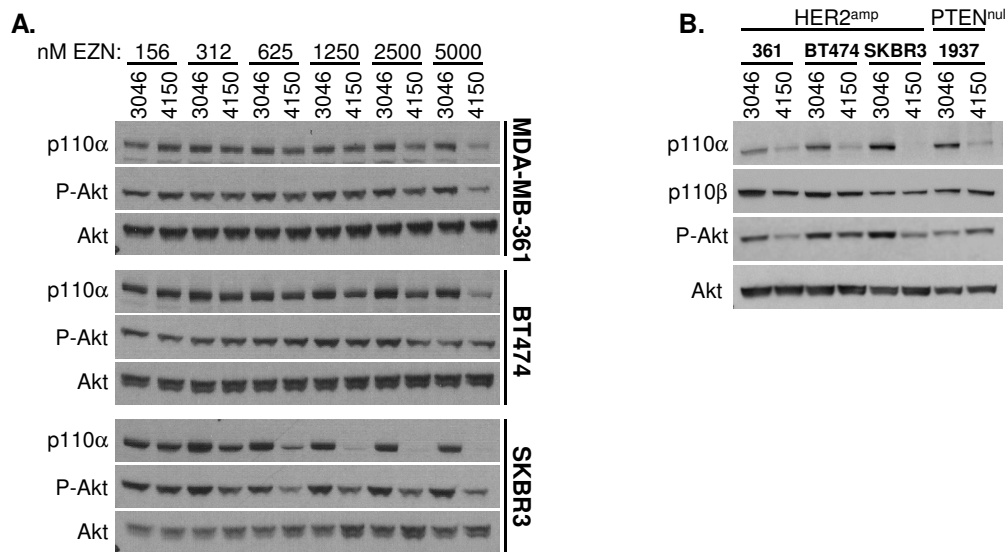

**Supplementary Figure 1: EZN4150 reduces expression of p110 $\alpha$  without effecting p110 $\beta$ :** Cells were treated with EZN3046 (scrambled control LNA-ASO) or EZN4150 (p110 $\alpha$  targeted LNA-ASO) for 10 days, with fresh media and LNA-ASOs replenished every three days. **(A)** Cells treated with the indicated concentration of compounds were lysed and the lysates were analyzed by immunoblot with the indicated antibodies. **(B)** MDA-MB-361 (361), BT474, SKBR3 or HCC1937 (1937) cells treated with the 5  $\mu$ M EZN compounds were lysed and the lysates analyzed by immunoblot.
