# Supplementary material for: Dual inhibition of Type I and Type III PI3 kinases increases tumor cell apoptosis in HER2+ breast cancers
Source: Springer Nature journal article supplement (doi:10.1186/s13058-015-0656-2), 2015-12-01
Supplement: MOESM2 [file 9781600]

EZN4150 (LNA antisense): AGCCATTCATTCCACC  
EZN4150 sense sequence target: GGTGGAATGAATGGCT  
PIK3CA siRNA #38 target sequence: CTGAGTAACAGACTAGCTA  
PIK3CA siRNA #39 target sequence: CTTATTGAGGTGGTGGAA

Human *PIK3CA* (NCBI Reference Sequence: NM\_006218.2):

ATGCC TCCACGACCATCATCAGGTGAACTGTGGGGCATCCACTTGATGCCCCCAAGAATCCTAGTAGAATGTTACTACCAATGGAATGATAGTGAC  
TTTAGAATGCCTCCGTGAGGCTACATTAATAACCATAAAGCATGAACTATTTAAAGAAGCAAGAAAATACCCCTCCATCAACTTCTTCAAGATGAAT  
CTTCTTACATTTTCGTAAGTGTACTCAAGAAGCAGAAAGGGGAAGAATTTTTTGATGAAACAAGACGACTTTGTGACCTTCGGCTTTTTCAACCCTTT  
TAAAAGTAATTGAACCAGTAGGCAACCGTGAAGAAAAGATCCTCAATCGAGAAATGGTTTTGCTATCGGCATGCCAGTGTGTGAATTTGATATGGT  
TAAAGATCCAGAAGTACAGGACTTCCGAAGAAAATTTCTGAACGTTTGTAAAGAAGCTGTGGATCTTAGGGACCTCAATTCACCTCATAGTAGAGCAA  
TGTATGCTATCCTCCAAATGTAGAATCTTCCACCAGAATTGCCAAAGCACATATATAATAAAATAGATAAAGGGCAAATAATAGTGGTGATCTGGGTA  
ATAGTTTCTCCAAATAATGACAAGCAGAAGTATACTCTGAAAATCAACCATGACTGTGTACCAGAACAAGTAATTGCTGAAGCAATCAGGAAAAAAAC  
TCGAAGTATGTTGCTATCCTCTGAACAATAAACTCTGTGTTTTAGAATATCAGGGCAAGTATATTTAAAAGTGTGTGGATGTGATGAATACTTCC  
TAGAAAAATATCCTCTGAGTCAGTATAAGTATATAAGAAGCTGTATAATGCTTGGGAGGATGCCAATTTGATGTTGATGGCTAAAGAAAGCCTTTAT  
TCTCAACTGCCAATGGACTGTTTTACAATGCCATCTTATTCCAGACGCATTTCCACAGCTACACCATATATGAATGGAGAAACATCTACAAAATCCCT  
TTGGGTTATAAATAGTGCACCTCAGAATAAAAATCTTTGTGCAACCTACGTGAATGTAAATATTCGAGACATTGATAAGATCTATGTTCCGAACAGGTA  
TCTACCATGGAGGAGAACCCTTATGTGACAATGTGAACACTCAAAGAGTACCTTGTTCCAATCCCAAGTGGGAATGAATATGATATATAC  
ATTCCTGATCTTCCCTCGTGTGCTCGACTTTGCCCTTCCATTTGCTCTGTTAAAGGCCGAAAGGGTGTAAAGAGGAACACTGTCCATTGGCATGGGG  
AAATATAAACTTGTATTACACAGACACTCTAGTATCTGGAAAAATGGCTTTGAATCTTTGGCCAGTACCTCATGGATTAGAAGATTTGCTGAACC  
CTATTGGTGTACTGGATCAAATCCAAATAAAGAACTCCATGCTTAGAGTTGGAGTTTTCAGCTGTTTCCAGCAGTGTGGTAAAGTTCCAGATATGCA  
GTGATTGAAGAGCATGCCAATTTGGTCTGTATCCCAGAGAAGCAGGATTTAGCTATTTCCACGCAGGAAGTGGTTCAGCAGTGTGGTAAAGTTCCAGATATGCA  
AAGGAAAAATGACAAAGAACAGCTCAAAGCAATTTCTACACGAGATCCTCTCTCTGAAATCACTGAGCAGGAGAAAGATTTTCTATGGAGTACACAGAC  
ACTATTGTGTAACATATCCCCGAAATTTCTACCCAAATGCTTCTGTCTGTTAAATGGAATTTCTAGAGATGAAGTAGCCAGATGTATTGCTTGGTAAAA  
GATTGGCCTCCAATCAAACCTGAACAGGCTATGGAACCTTCTGGACTGTAATTACCAGATCCTATGGTTCGAGGTTTTGCTGTTCCGGTCTTGGAAAA  
ATATTTAACAGATGACAACTTTCTCAGTATTTAATTCAGCTAGTACAGGTCCTAAAATATGAACAATATTTGGATAACTTGTGTGAGATTTTTAC  
TGAAGAAAGCATTGACTAATCAAAGGATTGGGCCTTTTTCTTTGGCATTAAAAATCTGAGATGCACAATAAAACAGTTAGCCAGAGGTTTGGCCTG  
CTTTTGGAGTCTATTGTGCTGATGTGGGATGTATTTGAAGCACCTGAATAGGCAAGTCGAGGCAATGGAAAAGCTCATTAACTTAACTGACATTCT  
CAAACAGGAGAAGAAGGATGAAACACAAAAGGTACAGATGAAGTTTTAGTTGAGCAATGAGGCGACCAGATTTTCATGGATGCTCTACAGGGCTTTC  
TGTCCTCTTAAACCCTGCTCATCAACTAGGAAACCTCAGGCTTGAAGAGTGTCAATTTATGCTCTGCAAAAAGGCCACTGTGGTTGAATTTGGGAG  
AACCAGACATCATGTGAGAGTTACTGTTTCAGAACAAATGAGATCATCTTTAAAAATGGGGATGATTTACGGCAAGATATGCTAACACTTCAAATTTAT  
TCGTATTATGAAAAATATCTGGCAAAAATCAAGGCTTTGATCTTCGAATGTTACCTTATGGTTGCTGTCAATCGGTGACTGTGTGGGAAGTATTGAGG  
TGGTGGAAATTCTCACACTATTATGCAAAATTCAGTGCAAAGGCGGCTTGAAGGTGCACTGCAGTTCAACAGCCACACACTACATCAGTGGCTCAAA  
GACAAGAACAAGGAGAAATATATGATGCAGCCATTGACCTGTTTACACGTTTCAATGTGCTGGATACTGTGTAGCTACCTTCATTTTGGGAATGGAGA  
TCGTACAATAGTAACATCATGGTGAAGACGATGGACAACCTTTCATATAGATTTTGGACACTTTTTGGATCACAAGAAGAAAAAATTTGGTTATA  
AACGAGAACGTGTGCCATTTGTTTTGACACAGGATTTCTTAATAGTGATTAGTAAAGGAGCCCAAGAATGCACAAAGACAAGAGAATTTGAGAGGTTT  
CAGGAGATGTGTTACAAGGCTTATCTAGCTATTCGACAGCATGCCAATCTCTTCATAAATCTTTCTCAATGATGCTTGGCTCTGGAATGCCAGAAC  
ACAATCTTTTGTGATGACATTGCATACATTGAAAGACCCTAGCCTTAGATAAAAATGAGCAAGAGGCTTTGGAGTATTTTCATGAAACAAATGAATGATG  
CACATCATGGTGGCTGGACAACAAAAATGGATTGGATCTTCCACACAATTAACAGCATGCATTGAACTGA

**Supplementary Figure 2: EZN4150 and p110 $\alpha$  siRNA target sequences within the *PIK3CA* gene:** The human *PIK3CA* coding sequence is presented. The nucleotide sequences targeted by EZN4150, si*PIK3CA* #38 and si*PIK3CA* #39 are highlighted.
