# Supplementary material for: Dual inhibition of Type I and Type III PI3 kinases increases tumor cell apoptosis in HER2+ breast cancers
Source: Springer Nature journal article supplement (doi:10.1186/s13058-015-0656-2), 2015-12-01
Supplement: MOESM3 [file 9781600]

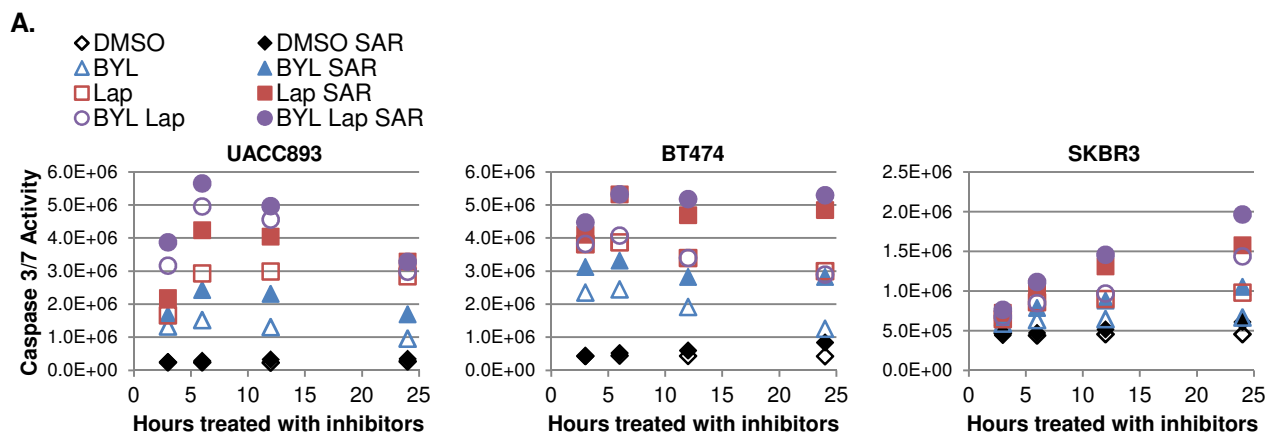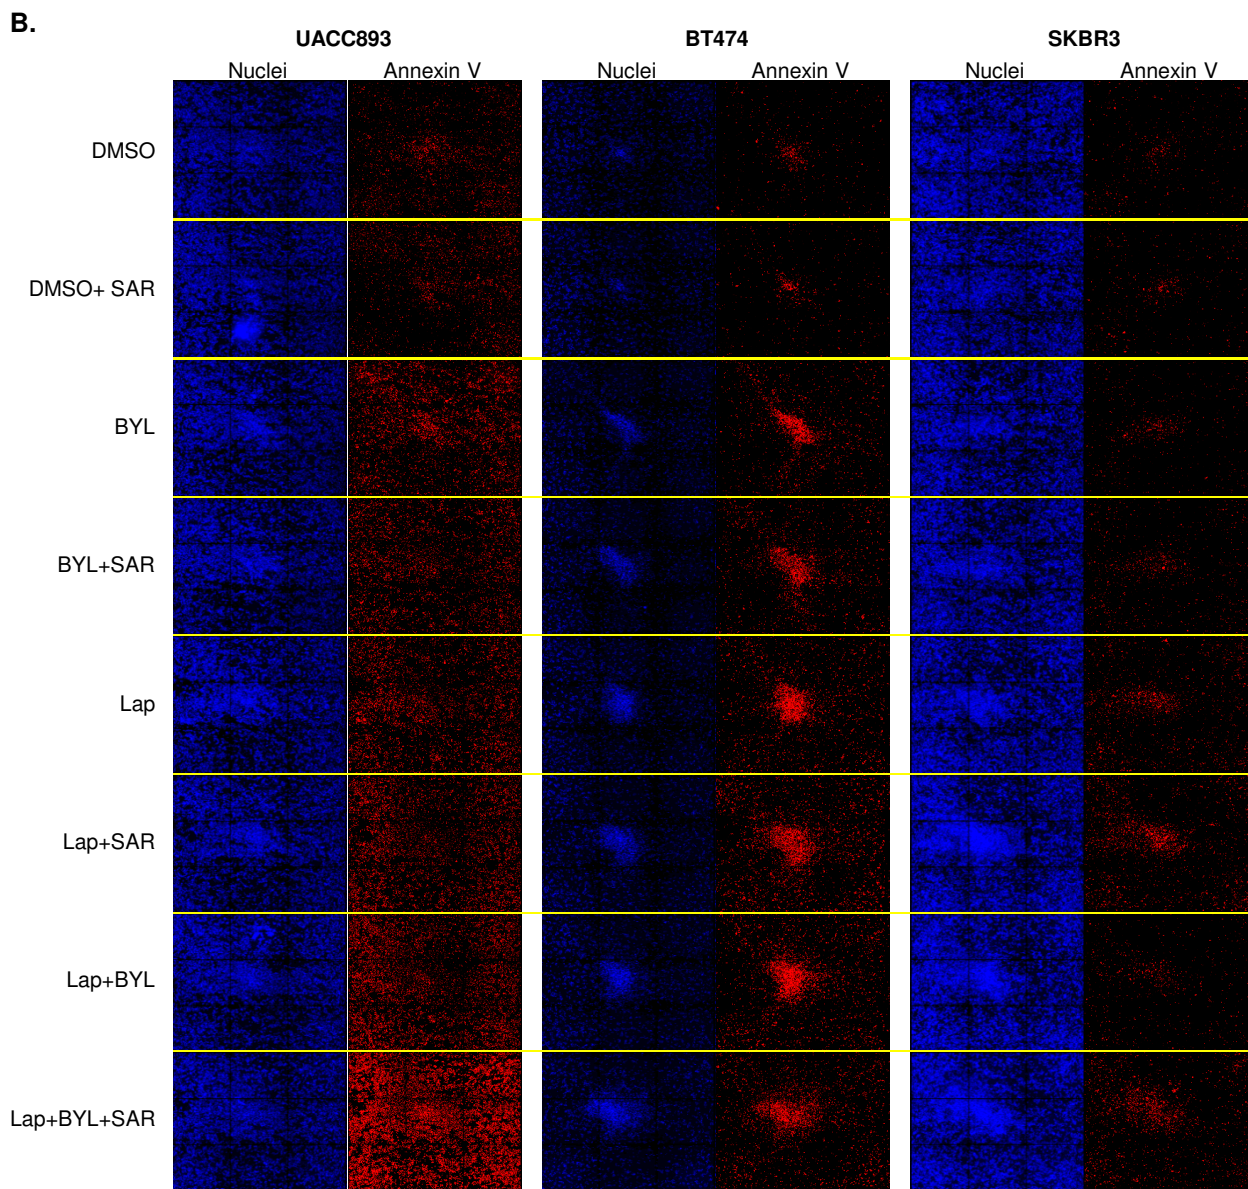

**Supplementary Figure 3: Combined inhibition of HER2, p110 $\alpha$  and Vps34 induces cell death: (A)** UACC893, BT474 or SKBR3 cells were treated 3, 6, 12 and 24 h with 1  $\mu$ M SAR405, 0.5  $\mu$ M Lapatinib and/or 0.5  $\mu$ M BYL719 before caspase 3/7 activity was determined. **(B)** UACC893 and BT474 were treated 6 h and SKBR3 were treated 24 h before being stained with Annexin V (red) with a nuclear counterstain (blue). 9 images were captured per well of quadruplicate wells. All 9 images of a representative well are presented. In both experiments, SAR405 was applied 30 min prior to the application of BYL719, lapatinib or DMSO control.
